1 ORIGINAL RESEARCH

2 **Manuscript title**

3 **Efficacy and Safety of Ayurveda Intervention (AYUSH 64) as add-on therapy for**  
4 **patients with COVID-19 infections – An open labelled, Parallel Group, Randomized**  
5 **controlled clinical trial**

6 *Pankaj bhardwaj<sup>1</sup>, Pawan Kumar Godatwar<sup>2</sup>, Jaykaran Charan<sup>3</sup>, Sanjeev Sharma<sup>4</sup>,*  
7 *Shazia Shaft<sup>5</sup>, Nishant Chauhan<sup>6</sup>, Pratibha Vyas<sup>7</sup>, Naveen Dutt<sup>8</sup>, Naresh Midha<sup>9</sup>,*  
8 *Ramniwas Jalandra<sup>10</sup>, Meenakshi Sharma<sup>11</sup>, Vijaya Lakshmi Nag<sup>12</sup>, Suman Sharma<sup>13</sup>,*  
9 *Sarvesh Kumar Singh<sup>14</sup>, Praveen Sharma<sup>15</sup>, Sanjeev Misra<sup>16</sup>*

10 <sup>1</sup>Additional Professor, Department of Community Medicine and Family Medicine, All  
11 India Institute of Medical Sciences (AIIMS) Jodhpur, Rajasthan, India, <sup>2</sup> Professor and  
12 HOD, Department of Roga Nidana, National Institute of Ayurveda, Jaipur, Rajasthan,  
13 <sup>3</sup>Associate Professor, Department of Pharmacology, All India Institute of Medical  
14 Sciences, Jodhpur, Rajasthan, India, <sup>4</sup> Director, National Institute of Ayurveda, Jaipur,  
15 Rajasthan, <sup>5</sup> Senior Resident, Department of Community Medicine and Family Medicine,  
16 All India Institute of Medical Sciences (AIIMS) Jodhpur, Rajasthan, India, <sup>6</sup> Additional  
17 Professor, Pulmonary Medicine, All India Institute of Medical Sciences (AIIMS)  
18 Jodhpur, Rajasthan, India, <sup>7</sup> Project assistant, NIIR NCD Jodhpur, Rajasthan, India, <sup>8</sup>  
19 Additional Professor Department of Pulmonary Medicine, All India Institute of Medical  
20 Sciences, Jodhpur, Rajasthan, India, <sup>9</sup> Assistant Professor, Department of General  
21 Medicine All India Institute of Medical Sciences (AIIMS) Jodhpur, Rajasthan, India, <sup>10</sup>  
22 Assistant Professor, Pulmonary Medicine, All India Institute of Medical Sciences  
23 (AIIMS) Jodhpur, Rajasthan, India, <sup>11</sup> Medical Officer, AYUSH, Jodhpur, Rajasthan, <sup>12</sup>

24 Professor and Head, Microbiology, All India Institute of Medical Sciences (AIIMS)  
25 Jodhpur, Rajasthan, India, <sup>13</sup> Associate Professor, Department of Ayurvedic Surgery,  
26 NIA, Jaipur, Rajasthan, <sup>14</sup> Assistant Professor, Department of Panchakarma, NIA, Jaipur,  
27 Rajasthan, <sup>15</sup> Professor and Head of Department , Department of Biochemistry, All India  
28 Institute of Medical Sciences, Jodhpur, Rajasthan, India, <sup>16</sup> Director, All India Institute of  
29 Medical Sciences, Jodhpur, Rajasthan, India.

30

31 **Correspondence:**

32 Dr. Jaykaran Charan

33 Associate Professor, Department of Pharmacology

34 All India Institute of Medical Sciences, Jodhpur

35 Email – [dr.jaykaran78@gmail.com](mailto:dr.jaykaran78@gmail.com)

36 Mobile – 9825219196

37

38 The authors have withdrawn this manuscript because they found a  
39 serious issue in data-analysis which leads to wrong interpretation of  
40 the results. Therefore, the authors do not wish this work to be cited as  
41 reference for the project. If you have any questions, please contact  
42 the corresponding author.

43

44

45
